# Supplementary material for: Occurrence of Hybrid Diarrhoeagenic Escherichia coli Associated with Multidrug Resistance in Environmental Water, Johannesburg, South Africa
Source: MDPI journal article supplement (doi:10.3390/microorganisms9102163), 2021-10-17
Supplement: s1 [file s1]

S1. Gel images of singleplex PCRs run for the confirmation of virulence genes detected in different pathotypes in this study.

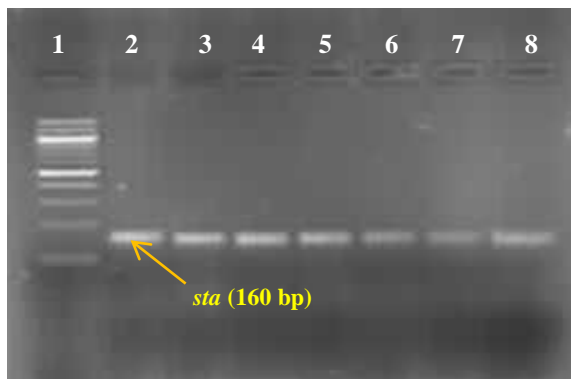

Figure S1: Gel image of singleplex PCR products:  
Lane 1: 100bp molecular marker (ladder); Lane 2-8: *E. coli* isolates showing *sta* (160 bp) gene

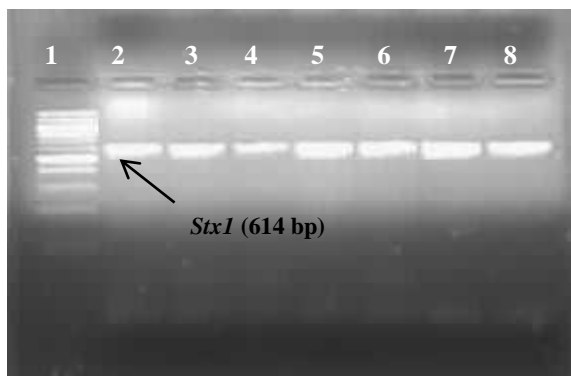

Figure S2: Gel image of singleplex PCR products:  
Lane 1: 100bp molecular marker (ladder); Lane 2-8: *E. coli* isolates showing *Stx1* (614 bp) gene

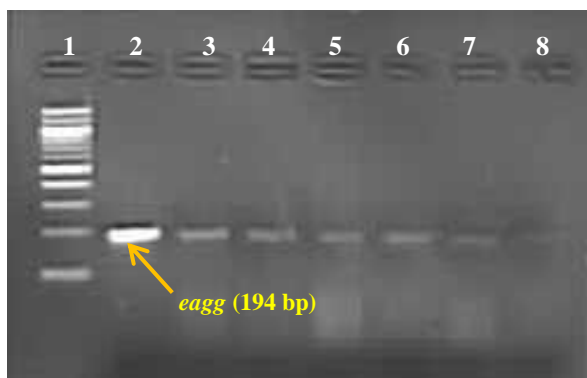

Figure S3: Gel image of singleplex PCR products:  
Lane 1: 100bp molecular marker (ladder); Lane 2-8: *E. coli* isolates showing *eagg* (194 bp) gene (EAEC).

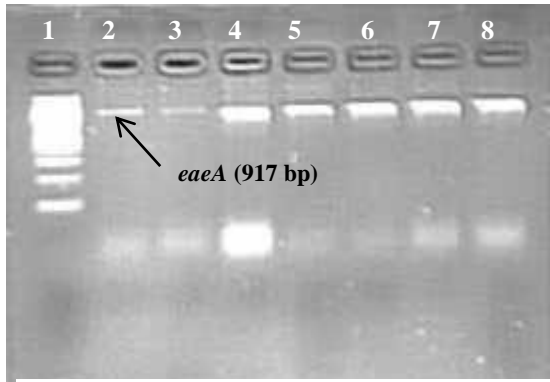

Figure S4: Gel image of singleplex PCR products:  
Lane 1: 100bp molecular marker (ladder); Lane 2-8:  
*E. coli* isolates showing *eaeA* (917 bp) gene  
(aEPEC).
